# Supplementary material for: Development and verification of prediction models for preventing cardiovascular diseases
Source: PLOS journal article supplement (doi:10.1371/journal.pone.0222809), 2019-09-19
Supplement: S4 (10.1371/journal.pone.0222809.s004) [file journal.pone.0222809.s004]

| Model          | Variables                                                                                                                                                                                                                                                                                                                                                                                                                        |
|----------------|----------------------------------------------------------------------------------------------------------------------------------------------------------------------------------------------------------------------------------------------------------------------------------------------------------------------------------------------------------------------------------------------------------------------------------|
| Cox regression | Age at baseline                                                                                                                                                                                                                                                                                                                                                                                                                  |
|                | Mean, standard deviation, minimum value, and maximum value of Body mass index, Systolic blood pressure, Diastolic blood pressure, Fasting plasma glucose and Total cholesterol, Hemoglobin, Aspartate transaminase, Alanine transaminase, Gamma-glutamyl transpeptidase                                                                                                                                                          |
|                | Mean and standard deviation of Current smoking and Exercise, Alcohol intake, Urine protein                                                                                                                                                                                                                                                                                                                                       |
|                | Mean of Family history of Hypertension, Heart disease, Stroke, Diabetes mellitus, etc(include cancer) and history Hypertension, Diabetes mellitus, etc(include cancer)                                                                                                                                                                                                                                                           |
| Deep learning  | Date of each health examination                                                                                                                                                                                                                                                                                                                                                                                                  |
|                | Age at baseline                                                                                                                                                                                                                                                                                                                                                                                                                  |
|                | Body mass index, Systolic blood pressure, Diastolic blood pressure, Fasting plasma glucose, Total cholesterol, Hemoglobin, Aspartate transaminase, Alanine transaminase, Gamma-glutamyl transpeptidase, Current smoking, Exercise, Alcohol intake, Urine protein, Family history of Hypertension, Heart disease, Stroke, Diabetes mellitus, Etc(include cancer) and History Hypertension, Diabetes mellitus, etc(include cancer) |
