# Supplementary material for: Development and verification of prediction models for preventing cardiovascular diseases
Source: PLOS journal article supplement (doi:10.1371/journal.pone.0222809), 2019-09-19
Supplement: S9 (10.1371/journal.pone.0222809.s009) [file journal.pone.0222809.s009]

(a) Internal data set

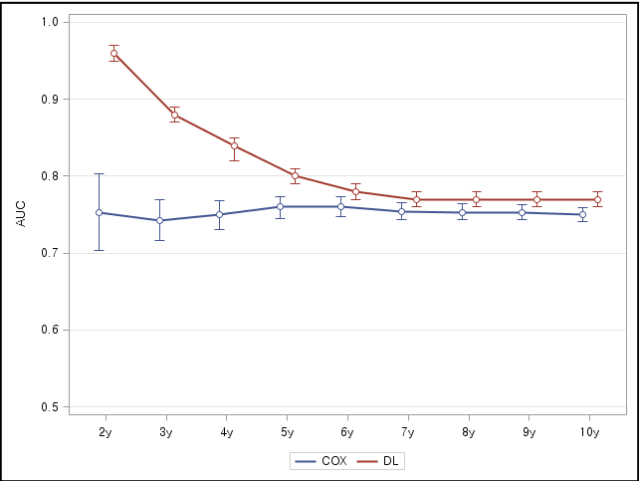

Male

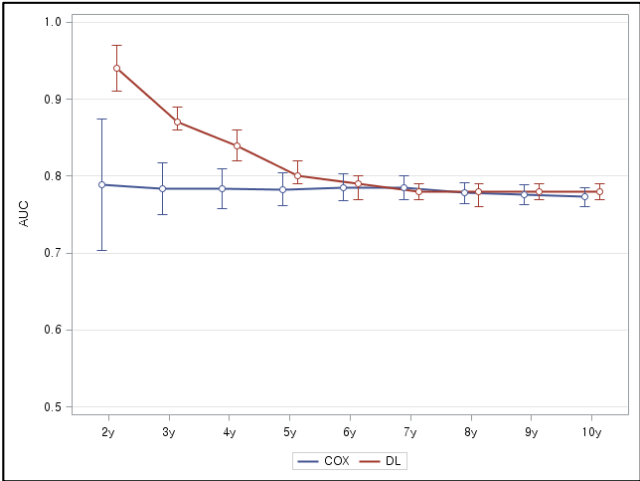

Female

(b) External data set

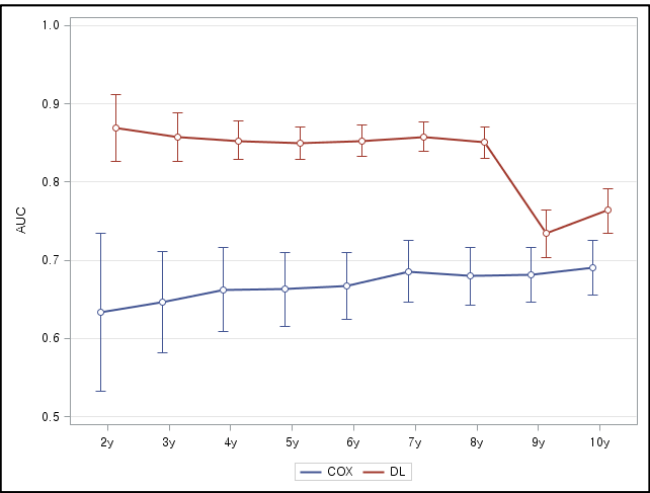

Male

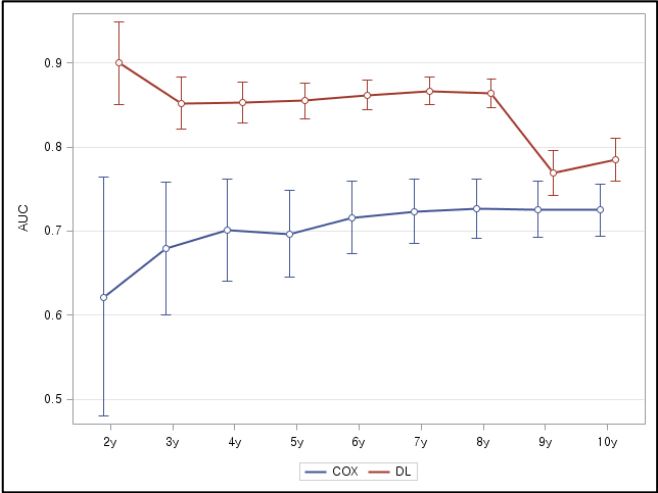

Female
